# Supplementary material for: Biallelic loss-of-function variants in GON4L cause microcephaly and brain structure abnormalities
Source: PubMed Central journal article supplement — NPJ Genom Med. 2024 Nov 5;9:55. doi: 10.1038/s41525-024-00437-5 (PMC11538285; doi:10.1038/s41525-024-00437-5), 2024-11-05
Supplement: 41525_2024_437_MOESM1_ESM.pdf [file 41525_2024_437_MOESM1_ESM.pdf]

## Supplementary information

### Supplementary Figures

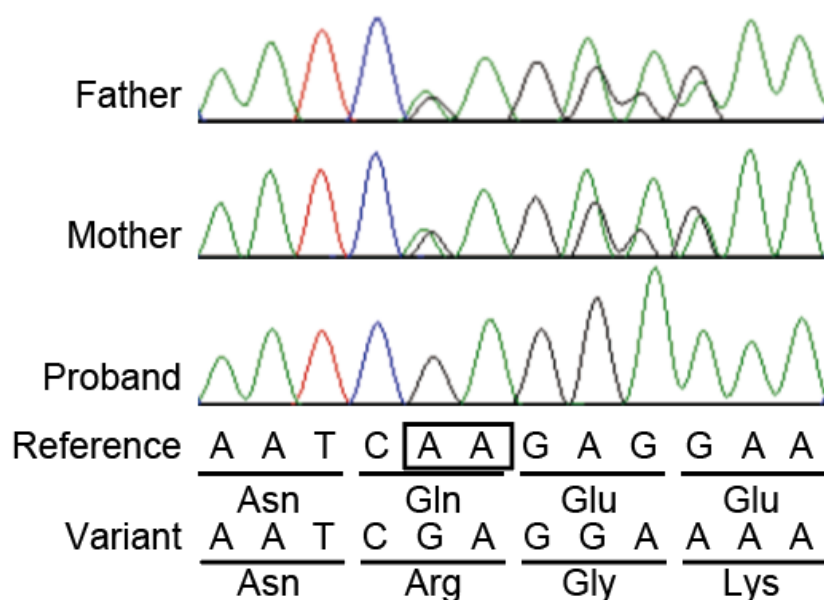

### Supplementary Figure 1 Chromatograms of the frameshift *GON4L* variant in family 1

Chromatograms of the *GON4L* variant [NM\_001282860.2:c.62\_63del, p.(Gln21Argfs\*12)] in family 1. Boxed bases were deleted.

clustalw.aln

CLUSTAL 2.1 multiple sequence alignment

```
NP_001269785.1_iso4      MLPCKKRRTTVTESLQHKGNQEENVDLESVAVKPESDQVKDLSSVSLSWDP SHGRVAGFE
NP_001269789.1_iso3      MLPCKKRRTTVTESLQHKGNQEENVDLESVAVKPESDQVKDLSSVSLSWDP SHGRVAGFE
NP_001269787.1_iso5      MLPCKKRRTTVTESLQHKGNQEENVDLESVAVKPESDQVKDLSSVSLSWDP SHGRVAGFE
NP_001269790.1_iso6      MLPCKKRRTTVTESLQHKGNQEENVDLESVAVKPESDQVKDLSSVSLSWDP SHGRVAGFE
NP_115668.4_iso2         MLPCKKRRTTVTESLQHKGNQEENVDLESVAVKPESDQVKDLSSVSLSWDP SHGRVAGFE
*****

NP_001269785.1_iso4      VQSLQDAGNQLGMEDTSLSSGMLTQNTNVP ILEGVDVAISQGITLPSLESFHLN IHIIGK
NP_001269789.1_iso3      VQSLQDAGNQLGMEDTSLSSGMLTQNTNVP ILEGVDVAISQGITLPSLESFHLN IHIIGK
NP_001269787.1_iso5      VQSLQDAGNQLGMEDTSLSSGMLTQNTNVP ILEGVDVAISQGITLPSLESFHLN IHIIGK
NP_001269790.1_iso6      VQSLQDAGNQLGMEDTSLSSGMLTQNTNVP ILEGVDVAISQGITLPSLESFHLN IHIIGK
NP_115668.4_iso2         VQSLQDAGNQLGMEDTSLSSGMLTQNTNVP ILEGVDVAISQGITLPSLESFHLN IHIIGK
*****

NP_001269785.1_iso4      GKLHATGSKRGGKMTLRPGPVTQEDRCDHL TLKEPFSGEPSEEVKEEGGKPMNSEGE IP
NP_001269789.1_iso3      GKLHATGSKRGGKMTLRPGPVTQEDRCDHL TLKEPFSGEPSEEVKEEGGKPMNSEGE IP
NP_001269787.1_iso5      GKLHATGSKRGGKMTLRPGPVTQEDRCDHL TLKEPFSGEPSEEVKEEGGKPMNSEGE IP
NP_001269790.1_iso6      GKLHATGSKRGGKMTLRPGPVTQEDRCDHL TLKEPFSGEPSEEVKEEGGKPMNSEGE IP
NP_115668.4_iso2         GKLHATGSKRGGKMTLRPGPVTQEDRCDHL TLKEPFSGEPSEEVKEEGGKPMNSEGE IP
*****

NP_001269785.1_iso4      SLPSGSQSAKPVSQPRKSTQPDVCA SPQEKPLRTL FHQPEEEIEDGGLFIPMEEQDNEES
NP_001269789.1_iso3      SLPSGSQSAKPVSQPRKSTQPDVCA SPQEKPLRTL FHQPEEEIEDGGLFIPMEEQDNEES
NP_001269787.1_iso5      SLPSGSQSAKPVSQPRKSTQPDVCA SPQEKPLRTL FHQPEEEIEDGGLFIPMEEQDNEES
NP_001269790.1_iso6      SLPSGSQSAKPVSQPRKSTQPDVCA SPQEKPLRTL FHQPEEEIEDGGLFIPMEEQDNEES
NP_115668.4_iso2         SLPSGSQSAKPVSQPRKSTQPDVCA SPQEKPLRTL FHQPEEEIEDGGLFIPMEEQDNEES
*****

NP_001269785.1_iso4      EKRRKKKKGTKRKRDRGRGQEGTLAYDLK LDDMLDRTL EDGAKQHNL TAVNVRN I LHEVIT
NP_001269789.1_iso3      EKRRKKKKGTKRKRDRGRGQEGTLAYDLK LDDMLDRTL EDGAKQHNL TAVNVRN I LHEVIT
NP_001269787.1_iso5      EKRRKKKKGTKRKRDRGRGQEGTLAYDLK LDDMLDRTL EDGAKQHNL TAVNVRN I LHEVIT
NP_001269790.1_iso6      EKRRKKKKGTKRKRDRGRGQEGTLAYDLK LDDMLDRTL EDGAKQHNL TAVNVRN I LHEVIT
NP_115668.4_iso2         EKRRKKKKGTKRKRDRGRGQEGTLAYDLK LDDMLDRTL EDGAKQHNL TAVNVRN I LHEVIT
*****

NP_001269785.1_iso4      NEHVYAMMKA A ISETEDMPMFEPK MTRSKL KEVVEKGVV IPTWNI SP I K KANE I K P P Q F V
NP_001269789.1_iso3      NEHVYAMMKA A ISETEDMPMFEPK MTRSKL KEVVEKGVV IPTWNI SP I K KANE I K P P Q F V
NP_001269787.1_iso5      NEHVYAMMKA A ISETEDMPMFEPK MTRSKL KEVVEKGVV IPTWNI SP I K KANE I K P P Q F V
NP_001269790.1_iso6      NEHVYAMMKA A ISETEDMPMFEPK MTRSKL KEVVEKGVV IPTWNI SP I K KANE I K P P Q F V
NP_115668.4_iso2         NEHVYAMMKA A ISETEDMPMFEPK MTRSKL KEVVEKGVV IPTWNI SP I K KANE I K P P Q F V
*****

NP_001269785.1_iso4      DIHLEEDSSD E E Y Q P D E E E D E T A E E S L L E S D V E S T A S S P R G A K K S R L R Q S S E M T E T D E
NP_001269789.1_iso3      DIHLEEDSSD E E Y Q P D E E E D E T A E E S L L E S D V E S T A S S P R G A K K S R L R Q S S E M T E T D E
NP_001269787.1_iso5      DIHLEEDSSD E E Y Q P D E E E D E T A E E S L L E S D V E S T A S S P R G A K K S R L R Q S S E M T E T D E
NP_001269790.1_iso6      DIHLEEDSSD E E Y Q P D E E E D E T A E E S L L E S D V E S T A S S P R G A K K S R L R Q S S E M T E T D E
NP_115668.4_iso2         DIHLEEDSSD E E Y Q P D E E E D E T A E E S L L E S D V E S T A S S P R G A K K S R L R Q S S E M T E T D E
*****

NP_001269785.1_iso4      ESGILSEAEKV T T P A I R H I S A E V V P M G P P P P K P K Q T R D S T F M E K L H A V D E E L A S S P V C M
NP_001269789.1_iso3      ESGILSEAEKV T T P A I R H I S A E V V P M G P P P P K P K Q T R D S T F M E K L H A V D E E L A S S P V C M
NP_001269787.1_iso5      ESGILSEAEKV T T P A I R H I S A E V V P M G P P P P K P K Q T R D S T F M E K L H A V D E E L A S S P V C M
NP_001269790.1_iso6      ESGILSEAEKV T T P A I R H I S A E V V P M G P P P P K P K Q T R D S T F M E K L H A V D E E L A S S P V C M
NP_115668.4_iso2         ESGILSEAEKV T T P A I R H I S A E V V P M G P P P P K P K Q T R D S T F M E K L H A V D E E L A S S P V C M
*****

NP_001269785.1_iso4      DSFGPMDDSL I AFRTRSKMPLK D V P L G Q L E A E L Q A P D I T P D M Y D P N T A D D E D W K M W L G G L
NP_001269789.1_iso3      DSFGPMDDSL I AFRTRSKMPLK D V P L G Q L E A E L Q A P D I T P D M Y D P N T A D D E D W K M W L G G L
NP_001269787.1_iso5      DSFGPMDDSL I AFRTRSKMPLK D V P L G Q L E A E L Q A P D I T P D M Y D P N T A D D E D W K M W L G G L
NP_001269790.1_iso6      DSFGPMDDSL I AFRTRSKMPLK D V P L G Q L E A E L Q A P D I T P D M Y D P N T A D D E D W K M W L G G L
NP_115668.4_iso2         DSFGPMDDSL I AFRTRSKMPLK D V P L G Q L E A E L Q A P D I T P D M Y D P N T A D D E D W K M W L G G L
*****

NP_001269785.1_iso4      MNDDVGN E D E A D D D D P E Y N F L E D L D E P D T E D F R T D R A V R I T K K E V N E L M E E L F E T F Q D E
NP_001269789.1_iso3      MNDDVGN E D E A D D D D P E Y N F L E D L D E P D T E D F R T D R A V R I T K K E V N E L M E E L F E T F Q D E
NP_001269787.1_iso5      MNDDVGN E D E A D D D D P E Y N F L E D L D E P D T E D F R T D R A V R I T K K E V N E L M E E L F E T F Q D E
NP_001269790.1_iso6      MNDDVGN E D E A D D D D P E Y N F L E D L D E P D T E D F R T D R A V R I T K K E V N E L M E E L F E T F Q D E
NP_115668.4_iso2         MNDDVGN E D E A D D D D P E Y N F L E D L D E P D T E D F R T D R A V R I T K K E V N E L M E E L F E T F Q D E
*****
```

NP\_001269785.1\_i\_so4 MGFSNMEDDGPEEEECVAEPRPNFNTPQALRFEELANLLNEQHRTVKELFEQLKMKKSS  
NP\_001269789.1\_i\_so3 MGFSNMEDDGPEEEECVAEPRPNFNTPQALRFEELANLLNEQHRTVKELFEQLKMKKSS  
NP\_001269787.1\_i\_so5 MGFSNMEDDGPEEEECVAEPRPNFNTPQALRFEELANLLNEQHRTVKELFEQLKMKKSS  
NP\_001269790.1\_i\_so6 MGFSNMEDDGPEEEECVAEPRPNFNTPQALRFEELANLLNEQHRTVKELFEQLKMKKSS  
NP\_115668.4\_i\_so2 MGFSNMEDDGPEEEECVAEPRPNFNTPQALRFEELANLLNEQHRTVKELFEQLKMKKSS  
\*\*\*\*\*

NP\_001269785.1\_i\_so4 AKQLQEVEKVKPQSEK VHQTL ILDPAGRKR LQQMQGHVQLL TQIHLLATCNPNLNPEAT  
NP\_001269789.1\_i\_so3 AKQLQEVEKVKPQSEK VHQTL ILDPAGRKR LQQMQGHVQLL TQIHLLATCNPNLNPEAT  
NP\_001269787.1\_i\_so5 AKQLQEVEKVKPQSEK VHQTL ILDPAGRKR LQQMQGHVQLL TQIHLLATCNPNLNPEAT  
NP\_001269790.1\_i\_so6 AKQLQEVEKVKPQSEK VHQTL ILDPAGRKR LQQMQGHVQLL TQIHLLATCNPNLNPEAT  
NP\_115668.4\_i\_so2 AKQLQEVEKVKPQSEK VHQTL ILDPAGRKR LQQMQGHVQLL TQIHLLATCNPNLNPEAT  
\*\*\*\*\*

NP\_001269785.1\_i\_so4 TTRIFLKELGTF AQSSIALHHQYNPKFQTLFQPCNLMGAMQL IEDFSTHVSIDCSPHKTV  
NP\_001269789.1\_i\_so3 TTRIFLKELGTF AQSSIALHHQYNPKFQTLFQPCNLMGAMQL IEDFSTHVSIDCSPHKTV  
NP\_001269787.1\_i\_so5 TTRIFLKELGTF AQSSIALHHQYNPKFQTLFQPCNLMGAMQL IEDFSTHVSIDCSPHKTV  
NP\_001269790.1\_i\_so6 TTRIFLKELGTF AQSSIALHHQYNPKFQTLFQPCNLMGAMQL IEDFSTHVSIDCSPHKTV  
NP\_115668.4\_i\_so2 TTRIFLKELGTF AQSSIALHHQYNPKFQTLFQPCNLMGAMQL IEDFSTHVSIDCSPHKTV  
\*\*\*\*\*

NP\_001269785.1\_i\_so4 KKTANFPCLPKQVAVILATSKVFMYPELLPVCSLAKKNPQDKIVFTKAEDNLLALGLKH  
NP\_001269789.1\_i\_so3 KKTANFPCLPKQVAVILATSKVFMYPELLPVCSLAKKNPQDKIVFTKAEDNLLALGLKH  
NP\_001269787.1\_i\_so5 KKTANFPCLPKQVAVILATSKVFMYPELLPVCSLAKKNPQDKIVFTKAEDNLLALGLKH  
NP\_001269790.1\_i\_so6 KKTANFPCLPKQVAVILATSKVFMYPELLPVCSLAKKNPQDKIVFTKAEDNLLALGLKH  
NP\_115668.4\_i\_so2 KKTANFPCLPKQVAVILATSKVFMYPELLPVCSLAKKNPQDKIVFTKAEDNLLALGLKH  
\*\*\*\*\*

NP\_001269785.1\_i\_so4 FEGTEFPNPLISKYLLTCKTAHQTLVRIKKNLNMNRAPDNIKFKYKTKQLPVLGKCCEEI  
NP\_001269789.1\_i\_so3 FEGTEFPNPLISKYLLTCKTAHQTLVRIKKNLNMNRAPDNIKFKYKTKQLPVLGKCCEEI  
NP\_001269787.1\_i\_so5 FEGTEFPNPLISKYLLTCKTAHQTLVRIKKNLNMNRAPDNIKFKYKTKQLPVLGKCCEEI  
NP\_001269790.1\_i\_so6 FEGTEFPNPLISKYLLTCKTAHQTLVRIKKNLNMNRAPDNIKFKYKTKQLPVLGKCCEEI  
NP\_115668.4\_i\_so2 FEGTEFPNPLISKYLLTCKTAHQTLVRIKKNLNMNRAPDNIKFKYKTKQLPVLGKCCEEI  
\*\*\*\*\*

NP\_001269785.1\_i\_so4 QPHQWKPIEREEHRLPFWLKASLPSIQEELRHMADGAREVGNMTGTTEINSDRSLEKDN  
NP\_001269789.1\_i\_so3 QPHQWKPIEREEHRLPFWLKASLPSIQEELRHMADGAREVGNMTGTTEINSDRSLEKDN  
NP\_001269787.1\_i\_so5 QPHQWKPIEREEHRLPFWLKASLPSIQEELRHMADGAREVGNMTGTTEINSDRSLEKDN  
NP\_001269790.1\_i\_so6 QPHQWKPIEREEHRLPFWLKASLPSIQEELRHMADGAREVGNMTGTTEINSDRSLEKDN  
NP\_115668.4\_i\_so2 QPHQWKPIEREEHRLPFWLKASLPSIQEELRHMADGAREVGNMTGTTEINSDRSLEKDN  
\*\*\*\*\*

NP\_001269785.1\_i\_so4 LELGSESRYPLLLPKGVVLKLPVATRFPRKAWRQKRSSVLKPLL IQPSPSLQPSFNPGK  
NP\_001269789.1\_i\_so3 LELGSESRYPLLLPKGVVLKLPVATRFPRKAWRQKRSSVLKPLL IQPSPSLQPSFNPGK  
NP\_001269787.1\_i\_so5 LELGSESRYPLLLPKGVVLKLPVATRFPRKAWRQKRSSVLKPLL IQPSPSLQPSFNPGK  
NP\_001269790.1\_i\_so6 LELGSESRYPLLLPKGVVLKLPVATRFPRKAWRQKRSSVLKPLL IQPSPSLQPSFNPGK  
NP\_115668.4\_i\_so2 LELGSESRYPLLLPKGVVLKLPVATRFPRKAWRQKRSSVLKPLL IQPSPSLQPSFNPGK  
\*\*\*\*\*

NP\_001269785.1\_i\_so4 TPARSTHSEAPPSKMVLRIPHIQPATVLTQVPGVPLGVSGGESFESPAALPAVPPPEAR  
NP\_001269789.1\_i\_so3 TPARSTHSEAPPSKMVLRIPHIQPATVLTQVPGVPLGVSGGESFESPAALPAVPPPEAR  
NP\_001269787.1\_i\_so5 TPARSTHSEAPPSKMVLRIPHIQPATVLTQVPGVPLGVSGGESFESPAALPAVPPPEAR  
NP\_001269790.1\_i\_so6 TPARSTHSEAPPSKMVLRIPHIQPATVLTQVPGVPLGVSGGESFESPAALPAVPPPEAR  
NP\_115668.4\_i\_so2 TPARSTHSEAPPSKMVLRIPHIQPATVLTQVPGVPLGVSGGESFESPAALPAVPPPEAR  
\*\*\*\*\*

NP\_001269785.1\_i\_so4 TSFPLSESQTLSSAPVVKVMLPSLAPSKFRKPYVRRRPSKRRGVKASPCMCKPAPVIHHP  
NP\_001269789.1\_i\_so3 TSFPLSESQTLSSAPVVKVMLPSLAPSKFRKPYVRRRPSKRRGVKASPCMCKPAPVIHHP  
NP\_001269787.1\_i\_so5 TSFPLSESQTLSSAPVVKVMLPSLAPSKFRKPYVRRRPSKRRGVKASPCMCKPAPVIHHP  
NP\_001269790.1\_i\_so6 TSFPLSESQTLSSAPVVKVMLPSLAPSKFRKPYVRRRPSKRRGVKASPCMCKPAPVIHHP  
NP\_115668.4\_i\_so2 TSFPLSESQTLSSAPVVKVMLPSLAPSKFRKPYVRRRPSKRRGVKASPCMCKPAPVIHHP  
\*\*\*\*\*

NP\_001269785.1\_i\_so4 ASVIFTVPATTVKIVSLGGGCNMIQPVNAAVAQSPQTIPIITLLVNPTSFPCPLNQSLVA  
NP\_001269789.1\_i\_so3 ASVIFTVPATTVKIVSLGGGCNMIQPVNAAVAQSPQTIPIITLLVNPTSFPCPLNQSLVA  
NP\_001269787.1\_i\_so5 ASVIFTVPATTVKIVSLGGGCNMIQPVNAAVAQSPQTIPIITLLVNPTSFPCPLNQSLVA  
NP\_001269790.1\_i\_so6 ASVIFTVPATTVKIVSLGGGCNMIQPVNAAVAQSPQTIPIITLLVNPTSFPCPLNQSLVA  
NP\_115668.4\_i\_so2 ASVIFTVPATTVKIVSLGGGCNMIQPVNAAVAQSPQTIPIITLLVNPTSFPCPLNQSLVA  
\*\*\*\*\*

NP\_001269785.1\_iso4 SSVSPLIVSGNSVNLPIPSTPEDKAHVNVDIACAVADGENAFQGLEPKLEPQELSPLSAT  
NP\_001269789.1\_iso3 SSVSPLIVSGNSVNLPIPSTPEDKAHVNVDIACAVADGENAFQGLEPKLEPQELSPLSAT  
NP\_001269787.1\_iso5 SSVSPLIVSGNSVNLPIPSTPEDKAHVNVDIACAVADGENAFQGLEPKLEPQELSPLSAT  
NP\_001269790.1\_iso6 SSVSPLIVSGNSVNLPIPSTPEDKAHVNVDIACAVADGENAFQGLEPKLEPQELSPLSAT  
NP\_115668.4\_iso2 SSVSPLIVSGNSVNLPIPSTPEDKAHVNVDIACAVADGENAFQGLEPKLEPQELSPLSAT  
\*\*\*\*\*

NP\_001269785.1\_iso4 VFPKVEHSPGPPLADAECQEGLSENSACRWTYVKTEEGRQALEPLPQGIQESLNNPTPGD  
NP\_001269789.1\_iso3 VFPKVEHSPGPPLADAECQEGLSENSACRWTYVKTEEGRQALEPLPQGIQESLNNPTPGD  
NP\_001269787.1\_iso5 VFPKVEHSPGPPLADAECQEGLSENSACRWTYVKTEEGRQALEPLPQGIQESLNNPTPGD  
NP\_001269790.1\_iso6 VFPKVEHSPGPPLADAECQEGLSENSACRWTYVKTEEGRQALEPLPQGIQESLNNPTPGD  
NP\_115668.4\_iso2 VFPKVEHSPGPPLADAECQEGLSENSACRWTYVKTEEGRQALEPLPQGIQESLNNPTPGD  
\*\*\*\*\*

NP\_001269785.1\_iso4 LEEIVKMEPEEAREEISGSPERDICDDIKVEHAVELDTGAPSEELSSAGEVTKQTVLQKE  
NP\_001269789.1\_iso3 LEEIVKMEPEEAREEISGSPERDICDDIKVEHAVELDTGAPSEELSSAGEVTKQTVLQKE  
NP\_001269787.1\_iso5 LEEIVKMEPEEAREEISGSPERDICDDIKVEHAVELDTGAPSEELSSAGEVTKQTVLQKE  
NP\_001269790.1\_iso6 LEEIVKMEPEEAREEISGSPERDICDDIKVEHAVELDTGAPSEELSSAGEVTKQTVLQKE  
NP\_115668.4\_iso2 LEEIVKMEPEEAREEISGSPERDICDDIKVEHAVELDTGAPSEELSSAGEVTKQTVLQKE  
\*\*\*\*\*

NP\_001269785.1\_iso4 EERSQPTKTPSSSQEPDEGTSGTDVNGSSKNALSSMDPEVRLSSPPGKPEDSSSDVGG  
NP\_001269789.1\_iso3 EERSQPTKTPSSSQEPDEGTSGTDVNGSSKNALSSMDPEVRLSSPPGKPEDSSSDVGG  
NP\_001269787.1\_iso5 EERSQPTKTPSSSQEPDEGTSGTDVNGSSKNALSSMDPEVRLSSPPGKPEDSSSDVGG  
NP\_001269790.1\_iso6 EERSQPTKTPSSSQEPDEGTSGTDVNGSSKNALSSMDPEVRLSSPPGKPEDSSSDVGG  
NP\_115668.4\_iso2 EERSQPTKTPSSSQEPDEGTSGTDVNGSSKNALSSMDPEVRLSSPPGKPEDSSSDVGG  
\*\*\*\*\*

NP\_001269785.1\_iso4 SVGTPVGPETGGEKNGPEEEEEEDFDDLQDEEDEMSSASEESVLSVPELQETMEKLTWL  
NP\_001269789.1\_iso3 SVGTPVGPETGGEKNGPEEEEEEDFDDLQDEEDEMSSASEESVLSVPELQETMEKLTWL  
NP\_001269787.1\_iso5 SVGTPVGPETGGEKNGPEEEEEEDFDDLQDEEDEMSSASEESVLSVPELQETMEKLTWL  
NP\_001269790.1\_iso6 SVGTPVGPETGGEKNGPEEEEEEDFDDLQDEEDEMSSASEESVLSVPELQVRAGEYSQV  
NP\_115668.4\_iso2 SVGTPVGPETGGEKNGPEEEEEEDFDDLQDEEDEMSSASEESVLSVPELQVRAGEYSQV  
\*\*\*\*\* : : :

NP\_001269785.1\_iso4 ASERRMSQEGESEEEENSQEENSEPEEEEEEEAEGMESLQKEDEMTDEAVGDSAEPPTFA  
NP\_001269789.1\_iso3 ASERRMSQEGESEEEENSQEENSEPEEEEEEEAEGMESLQKEDEMTDEAVGDSAEPPTFA  
NP\_001269787.1\_iso5 ASERRMSQEGESEEEENSQEENSEPEEEEEEEAEGMESLQKEDEMTDEAVGDSAEPPTFA  
NP\_001269790.1\_iso6 FRG-----  
NP\_115668.4\_iso2 FRG-----

NP\_001269785.1\_iso4 SPETAPEVETSRTPPGESIKAAGKGRNNHRARNKRGSRARASKDTSKLLLLYDEDILERD  
NP\_001269789.1\_iso3 SPETAPEVETSRTPPGESIKAAGKGRNNHRARNKRGSRARASKDTSKLLLLYDEDILERD  
NP\_001269787.1\_iso5 SPETAPEVETSRTPPGESIKAAGKGRNNHRARNKRGSRARASKDTSKLLLLYDEDILERD  
NP\_001269790.1\_iso6 -----  
NP\_115668.4\_iso2 -----

NP\_001269785.1\_iso4 PLREQKDLAFAGAYLTRVREALQHIPGKYEDFLQVIYEFESSTQRRRTAVDLYKSLQILLQ  
NP\_001269789.1\_iso3 PLREQKDLAFAGAYLTRVREALQHIPGKYEDFLQVIYEFESSTQRRRTAVDLYKSLQILLQ  
NP\_001269787.1\_iso5 PLREQKDLAFAGAYLTRVREALQHIPGKYEDFLQVIYEFESSTQRRRTAVDLYKSLQILLQ  
NP\_001269790.1\_iso6 -----  
NP\_115668.4\_iso2 -----

NP\_001269785.1\_iso4 DWPQLLKDFAAFLLPEQALACGLFEEQQAFEKSRKFLRQLEICFAENPSHHQKIKVLOG  
NP\_001269789.1\_iso3 DWPQLLKDFAAFLLPEQALACGLFEEQQAFEKSRKFLRQLEICFAENPSHHQKIKVLOG  
NP\_001269787.1\_iso5 DWPQLLKDFAAFLLPEQALACGLFEEQQAFEKSRKFLRQLEICFAENPSHHQKIKVLOG  
NP\_001269790.1\_iso6 -----LSNMYHLLICHLLAC  
NP\_115668.4\_iso2 -----LSNMYHLLICHLLAC  
\* : \* : \*

NP\_001269785.1\_iso4 CADCLPQEI TELKTQMWQLLKGDHLDQEFISIFFDHLRPAASRMGDFEENWTEEKEYEF  
NP\_001269789.1\_iso3 CADCLPQEI TELKTQMWQLLKGDHLDQEFISIFFDHLRPAASRMGDFEENWTEEKEYEF  
NP\_001269787.1\_iso5 CADCLPQEI TELKTQMWQLLKGDHLDQEFISIFFDHLRPAASRMGDFEENWTEEKEYEF  
NP\_001269790.1\_iso6 CTMDSPKIIC-----  
NP\_115668.4\_iso2 CTMDSPKIIC-----  
\* : \* : \*

NP\_001269785.1\_iso4 DGFEEVALPDVEEEEEPPK IPTASKNKRKKE IGVQNHDKETE WPDGAKDCACSCHEGGPD  
 NP\_001269789.1\_iso3 DGFEEVALPDVEEEEEPPK IPTASKNKRKKE IGVQNHDKETE WPDGAKDCACSCHEGGPD  
 NP\_001269787.1\_iso5 DGFEEVALPDVEEEEEPPK IPTASKNKRKKE IGVQNHDKETE WPDGAKDCACSCHEGGPD  
 NP\_001269790.1\_iso6 -----  
 NP\_115668.4\_iso2 -----

NP\_001269785.1\_iso4 SKLKKSKRRSCSHCSSKVCDSKSYKSKEPHEL VGSSPHREASMPGAKEAGQGKDMMEEE  
 NP\_001269789.1\_iso3 SKLKKSKRRSCSHCSSKVCDSKSYKSKEPHEL VGSSPHREASMPGAKEAGQGKDMMEEE  
 NP\_001269787.1\_iso5 SKLKKSKRRSCSHCSSKVCDSKSYKSKEPHEL VGSSPHREASMPGAKEAGQGKDMMEEE  
 NP\_001269790.1\_iso6 -----  
 NP\_115668.4\_iso2 -----

NP\_001269785.1\_iso4 APEERESTEATQSRTVRRTRKGEMPVSAGLAVGSTLPSPREVTYTERLLLDGPPPHSPET  
 NP\_001269789.1\_iso3 APEERESTEATQSRTVRRTRKGEMPVSAGLAVGSTLPSPREVTYTERLLLDGPPPHSPET  
 NP\_001269787.1\_iso5 APEERESTEATQSRTVRRTRKGEMPVSG-LAVGSTLPSPREVTYTERLLLDGPPPHSPET  
 NP\_001269790.1\_iso6 -----  
 NP\_115668.4\_iso2 -----

NP\_001269785.1\_iso4 PQFPPTTGAVLYTVKRNOVGPEVRSCP KASPR LQKERE GQKAVSESEALMLVWDASET EK  
 NP\_001269789.1\_iso3 PQFPPTTGAVLYTVKRNOVGPEVRSCP KASPR LQKERE GQKAVSESEALMLVWDASET EK  
 NP\_001269787.1\_iso5 PQFPPTTGAVLYTVKRNOVGPEVRSCP KASPR LQKERE GQKAVSESEALMLVWDASET EK  
 NP\_001269790.1\_iso6 -----  
 NP\_115668.4\_iso2 -----

NP\_001269785.1\_iso4 LPGTVEPPASFLSPVSSKTRDAGR RHVSGK PDTQERWLPSSRARVKTRDRTPVHESPSG  
 NP\_001269789.1\_iso3 LPGTVEPPASFLSPVSSKTRDAGR RHVSGK PDTQERWLPSSRARVKTRDRTPVHESPSG  
 NP\_001269787.1\_iso5 LPGTVEPPASFLSPVSSKTRDAGR RHVSGK PDTQERWLPSSRARVKTRDRTPVHESPSG  
 NP\_001269790.1\_iso6 -----  
 NP\_115668.4\_iso2 -----

NP\_001269785.1\_iso4 IDTSETSPKAPRGGLAKDSGTQAKGPEGEQQPKAAEATVCANNSKVSSTGEKVVLWTREA  
 NP\_001269789.1\_iso3 IDTSETSPKAPRGGLAKDSGTQAKGPEGEQQPKAAEATVCANNSKVSSTGEKVVLWTREA  
 NP\_001269787.1\_iso5 IDTSETSPKAPRGGLAKDSGTQAKGPEGEQQPKAAEATVCANNSKVSSTGEKVVLWTREA  
 NP\_001269790.1\_iso6 -----  
 NP\_115668.4\_iso2 -----

NP\_001269785.1\_iso4 DRVIL TMCQEQGAQPQTFNI ISQQLGNKTPAEVSHRFRELMQLFHTACEASSEDEDDATS  
 NP\_001269789.1\_iso3 DRVIL TMCQEQGAQPQTFNI ISQQLGNKTPAEVSHRFRELMQLFHTACEASSEDEDDATS  
 NP\_001269787.1\_iso5 DRVIL TMCQEQGAQPQTFNI ISQQLGNKTPAEVSHRFRELMQLFHTACEASSEDEDDATS  
 NP\_001269790.1\_iso6 -----  
 NP\_115668.4\_iso2 -----

NP\_001269785.1\_iso4 TSNADQLSDHGDLLSEEELDE  
 NP\_001269789.1\_iso3 TSNADQLSDHGDLLSEEELDE  
 NP\_001269787.1\_iso5 TSNADQLSDHGDLLSEEELDE  
 NP\_001269790.1\_iso6 -----  
 NP\_115668.4\_iso2 -----

### Supplementary Figure 2 GON4L protein alignment by CLUSTALW

Five GON4L protein sequences encoded by each isoform were aligned using CLUSTALW (<https://www.genome.jp/tools-bin/clustalw>): NP\_001269785.1 encoded by NM\_001282856.2 (transcript variant 4), NP\_001269789.1 encoded by NM\_001282860.2 (transcript variant 3), NP\_001269787.1 encoded by NM\_001282858.2 (transcript variant 5), NP\_001269790.1 encoded by NM\_001282861.2 (transcript variant 6), and NP\_115668.4 encoded by NM\_032292.6 (transcript variant 2).

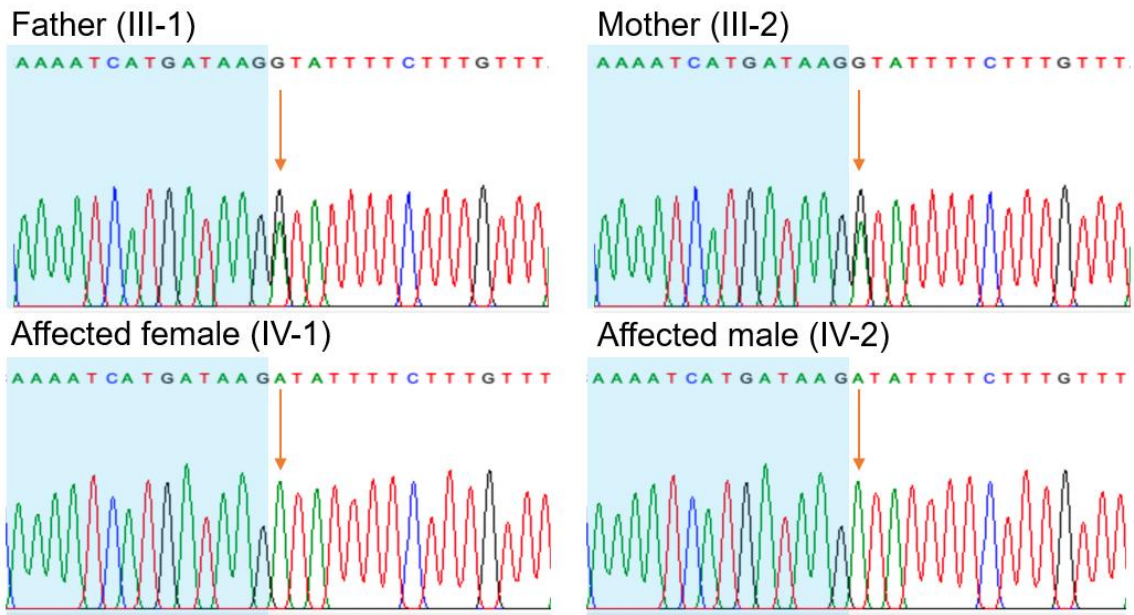

**Supplementary Figure 3 Chromatograms of the *GON4L* variant in family 2**

The variant (NM\_001282860.2:c.5517+1G>A) is indicated by orange arrows. The exonic regions are highlighted by light-blue shading.

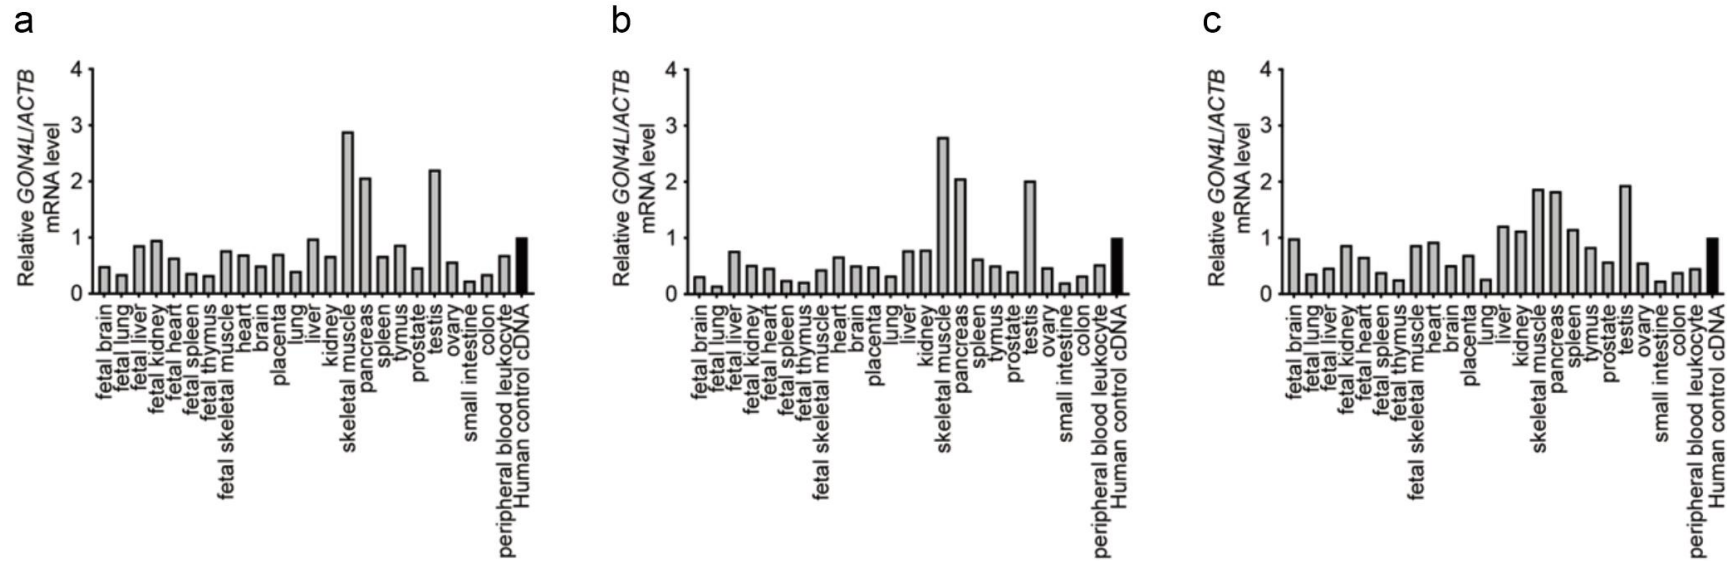

### Supplementary Figure 4 Human *GON4L* expression

*GON4L* expression in human fetal and adult tissues assessed by TaqMan assays. Panels a and b show the relative expression covering short and long isoforms (A: Hs00228595\_m1, B: Hs01685033\_mH), and Panel c shows the expression specific for long isoforms (Hs00250331\_m1). Expression levels were normalized against *ACTB* and levels relative to the control are shown.

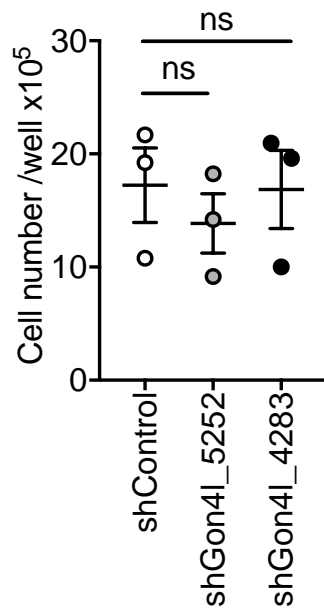

### Supplementary Figure 5 Growth of *Gon4l*-knockdown PC12 cells

Numbers of live cells after culture for 5 days are shown. Dots represent data from each of three independent experiments and bars represent the mean with standard error of the mean (SEM). ns, not significant. One-way ANOVA followed by Tukey's multiple comparison test was used for statistical analysis.









gon41b\_NP\_001188464.1 WLKKSPLLIQKSICQSDLTMTST-----TKSASLPFPKETRYPQFLPKGL  
gon41a\_XP\_003200651.2 WLSKNLKCIIYKHVRTYNQASGNP-----QTTEATDPAGPGPHFCFPPGMR  
GON4L\_NP\_001269789 WLKASLPSIQEELRHMDGAREVGNMTGTTEINSDRSLEKDNLELGSESR  
\*\* . . \* \* : : . . . . : .

gon41b\_NP\_001188464.1 SLRLHPSQVASRPSQPKSRILRAFTNRTLAPLAKAPSCPTGTGHLTNI  
gon41a\_XP\_003200651.2 YPLSLPEDLAQTLEASALSAFKKKDKTDKSAKPLKPPPSAEKLELVN-  
GON4L\_NP\_001269789 YPLLLPKGVVLKLPVATRFPKAWRQKRSSVLKPLLIQPSPSLQPSFNP  
\* . : . . : : . . . .

gon41b\_NP\_001188464.1 TPVLLLAQAPSTPINGVFPVPLVHPSLTPAHGTVPLNASYPINFHYLSPELG  
gon41a\_XP\_003200651.2 -----  
GON4L\_NP\_001269789 GKTPARSTHSEAPPSKMVLRIPHPIQPATVLTQTVPGVPLG---VSGGES

gon41b\_NP\_001188464.1 ASNPAHLPANLPPSVVQKPCQDVPLLSTGTVKTHGVQQQTSKHKKRTMP  
gon41a\_XP\_003200651.2 -----QLPAILPKTSL-----  
GON4L\_NP\_001269789 FESPAALPAVPPEARTSFPLSE-----SQT  
\*\*\* \* :

gon41b\_NP\_001188464.1 RKLAPLRPAPQLPRLLPLSSGSIGNISNPGI IIDQQI SLNVPHNLQSDNV  
gon41a\_XP\_003200651.2 --LSRPQPNPCLPGNRAITGPFILSRVPP-----VGSKQA  
GON4L\_NP\_001269789 LLSSAPVPKVMLPSLAPSKFRKPYVRRRPS-----KRRGVKAS  
: \* \*\* . . \* .

gon41b\_NP\_001188464.1 IVIKAHENVNTHRTVPSLSPDLVVQLVPQTQVAENTTSSLPRKTTPRSDV  
gon41a\_XP\_003200651.2 RAIATSPNISTTFKPSSTTSAPVKNVETPMGISCASAAQRDIIITLPAAV  
GON4L\_NP\_001269789 PCMKPAPVIHHPASVIFTVPATTVKIVSLGGGCNMIQPVNAAVAQSPQTI  
: . : . . : \* . . :

gon41b\_NP\_001188464.1 SQTAKDIPSVQSSGENGQRTVFSPQTAAPAAVDSSQFVLVQTVSPTGPPQ  
gon41a\_XP\_003200651.2 TPELKSYPG-----HITVNQTQIVTSNVVEPAVPR-  
GON4L\_NP\_001269789 PITLLVNPTSFPCPLNQSLVASSVSPLIVSGNSVNLPIPTPEDKAHVN  
. . . : : : . . .

```

gon41b_NP_001188464.1      FLLLPQDSLVLNQPASLPSEGTLQNLSSQ----TSHLDISTTSTALKNSE
gon41a_XP_003200651.2      -----ASNLIISFQPPQ----VANTFICPTPIINTNVQ
GON4L_NP_001269789        VDIACAVADGENAFQGLEPKLEPQELSPLSATVFPKVEHSPGPPLADAEC
                               .: . . . .: . . .

```

```

gon41b_NP_001188464.1      KTEVHLNNTTSLPVSREEDGERQEVDEEMVGDREWEEMASALFGSPLLA
gon41a_XP_003200651.2      MPQNHISQRCGLTPKLLPKVSGGLAQVCPKPVNRFVLLPSGNVFANSSFG
GON4L_NP_001269789        QEGLSENSACRWTVVKTEEGRQALEPLPQGIQESLNNPTPGDLEEIVKME
                               ..      :      :      .. :      :

```

```

gon41b_NP_001188464.1      LSESSCSPDSSPDASMDSGSDAMVRVEMEDGELPSVHSASATQETPDVHK
gon41a_XP_003200651.2      HQRAGQEQLTKQSSALKCKHVKLMRQOTSQDSLHSADRLKGDQSQMSFIQ
GON4L_NP_001269789        PEEAREEISGSPERDICDDIKVEHAVELDTGAPSEELSSAGEVTKQTVLQ
                               ..: . . . :      : . . . . . . . :

```

```

gon41b_NP_001188464.1      HSSGDEKEQQSSGGEKQNSGNEEGRAEESERKDEAQDEDKGGEKNEDGE
gon41a_XP_003200651.2      ETPNDGFEETAEAELNDDDDDDGGIVENEEERKIDSIEMSLTLESS
GON4L_NP_001269789        KEEERSQPTKTPSSSQEPPDEGTSGTDVNGSSKNALSSMDPEVRLSSPP
                               .      : . : : . . . . . . . .

```

```

gon41b_NP_001188464.1      GDGKRDEGGSGDKGREEKDGDEKDGGERDEEEEDFDDLTQDEDEEEVM
gon41a_XP_003200651.2      GSPMPSIDG-----DAEMEMEKPEEQKEKEQEGCNRLFGDEETG
GON4L_NP_001269789        GKPEDSSSVDGQSVGTPVGPETGGEKNGPEEEEDFDDLTQDEEDE--M
                               *. . . . : : : .:.*:: . . . :*

```

```

gon41b_NP_001188464.1      SSASEESVLSVPELQETMEKLTWLASERRLCREGDSEEDNSPTSPTSPTS
gon41a_XP_003200651.2      GADNVSGVRLVPELQETMEKFLHLATKTVSEKEGRS-----
GON4L_NP_001269789        SSASEESVLSVPELQETMEKLTWLASERRMSQEGESEEEENSQEENSEPEE
                               .: . . .* *****: **: : ** *

```

```

gon41b_NP_001188464.1      PNSQNSPASQNSQEENSEDEDDGAMKGDELEAGEGEGEKLEPGDAPAGDD
gon41a_XP_003200651.2      -----
GON4L_NP_001269789        EEEEEAEGMESLQKEDEMTDEAVG-----DSAEKPPTFASPETAPEVE

```

gon41b\_NP\_001188464.1 PPQISEKVGGRGRGRGRPPPRSLKRGRRQERGSKDASKLLLLLYDDHILDN  
gon41a\_XP\_003200651.2 -----NIKSKHQPSGSYWTQTERKTVLHNDASDH  
GON4L\_NP\_001269789 TSRTPPGESIKAAGKGRNNHRARNKRGSRARASKDTSKLLLLLYDEDILER  
: . :: : .. :.

gon41b\_NP\_001188464.1 DPMRESKDMAYAQAYLNRVREALQDVPKVEEFLGLLYEFDQAGESHSVI  
gon41a\_XP\_003200651.2 DPYRDAKDIAFAQAYLEKVEVLHQVPGKVDFELCILSDFVKNPESHTSL  
GON4L\_NP\_001269789 DPLREQKDLAFAQAYLTRVREALQHIPGKYEDFLQVIYEFESSTQRRTAV  
\*\* \*: \*\*:\*.\*\*\*\*\* :\* \*.\*.:\*\*\* ::\*\* :: :\* . : :: :

gon41b\_NP\_001188464.1 ELFAQLKQLLKDWPELLKDFAAFLLEPEQALECGLFEEQQAFERSRRLRQ  
gon41a\_XP\_003200651.2 QLLMRLKPILELDWPELLQDFAAFLHPDQARECGLLAEQQAFERSRGFLRQ  
GON4L\_NP\_001269789 DLYKSLQILLQDWPQLLKDFAAFLLEPEQALACGLFEEQQAFEKSRKFLRQ  
:\* \*: :\*:\*\*\*:\*\*\*:\*\*\*\*\* \*:\*\* \*\*\*: \*\*\*\*\*:\* \*\*\*\*

gon41b\_NP\_001188464.1 LEISFGENPSHYQKIVRALQSGSPLSPAGIEELKTQMATLLKGHTHLQGE  
gon41a\_XP\_003200651.2 LESTFGEQSYLYRKVVHILQGDQSQGLADLKEIKAEMALLLRDHTDLLEE  
GON4L\_NP\_001269789 LEICFAENPSHHQKI I KVLQGCADCLPQEITELKTQMWQLLKGHDHLQDE  
\*\* \*.\*.: :\*:\*\*\*: \*\* . : \*:\*:\* \*\*:\*.\* \* \*

gon41b\_NP\_001188464.1 FWMFFDEMPPPARPGQFEEAVWPEDVATGTDGEAGVSVTSRGGVWGGFE  
gon41a\_XP\_003200651.2 FWEYFKQIYP-----  
GON4L\_NP\_001269789 FSIFFDHLRPAASRMGDFEEINWTEEKEYEFDG-----FE  
\* :\*..: \*

gon41b\_NP\_001188464.1 EVTLPDLDEDEESHKIRQISSRSKRKE----LHTYKDCDWPEKDCSCSC  
gon41a\_XP\_003200651.2 -----QVQENVETNQVLE-----EKGPSQPS  
GON4L\_NP\_001269789 EVALPDVEEEEEPPKIPTASKNKRKKEIGVQNHDKETEWPDGAKDCACSC  
:::\*: \*. :: \* : ..

gon41b\_NP\_001188464.1 HDSVHDAKHRRHRKRGCLRCQSNKAANGSKVLKGRDSAFSSADAQSERGG  
gon41a\_XP\_003200651.2 RNMLADKKLETDKTSIKHRRKTNKHAQMAEMRRNK-----VKNSSAM  
GON4L\_NP\_001269789 HEGGPD SKLKKSKRRSCSHCSSKVCDSKSYKSKEPHELVGSSPHREASPM  
:: \* \* . \* : .:: . : : ..

```

gon41b_NP_001188464.1      EEKKEEERVLGEDGEAEKELKDETGSGANS-----
gon41a_XP_003200651.2      LDKDSEASLGDS-----
GON4L_NP_001269789         PGAKEAGQGKDMEEEEAPEERESTEATQSRVTRTRKGEMPVSAGLAVGS
                               ..      :

gon41b_NP_001188464.1      -----
gon41a_XP_003200651.2      -----
GON4L_NP_001269789         TLPSPREVTVTERLLLDGPPPHSPETPQFPPTTGAVLYTVKRNQVGPEVR

gon41b_NP_001188464.1      -----
gon41a_XP_003200651.2      -----
GON4L_NP_001269789         SCPKASPRLQKEREQKAVSESEALMLVWDASETEKLPGTVEPPASFLSP

gon41b_NP_001188464.1      -----PHHDGEGSVWEREERATSSIPPEQNTHNQDDEEKTEEKHH
gon41a_XP_003200651.2      -----
GON4L_NP_001269789         VSSKTRDAGRHRHVSQKPDQERWLPSSRARVKTRDRTCPVHESPSGIDTS

gon41b_NP_001188464.1      ASPEKHSRDEEDSAESGQTEAAQQSSLSPALDAPVCAKNISLPTGERVI
gon41a_XP_003200651.2      -----QQSLFNATGSSVCAKNISHTSAGKKVV
GON4L_NP_001269789         ETSPKAPRGGLAKDSGTQAKGPEGEQQPKAAEATVCANNSKVSSTGEKVV
                               ..      *      :.***:*      . :.***:

gon41b_NP_001188464.1      LWTREADRVILTTCQQQGASQSTFQAVSEQLGNKTASEVSRFRDLMLRLF
gon41a_XP_003200651.2      LWTREADRVILTTCQQRGAKQTFHAIAAQLGNKTASEVSRFQDLIKLF
GON4L_NP_001269789         LWTREADRVILTMCEQGAQPQTFNIISQQLGNKTPAEVSHRFRELMQLF
***** **::**      **: :: *****:***.***:***:

gon41b_NP_001188464.1      HTSASQASSEDEAAEQSATDEEQD-----
gon41a_XP_003200651.2      HKSKLHHTPDNWTQ-----
GON4L_NP_001269789         HTACEASSEDEDDATSTSNADQLSDHGDLLSEEELDE
                               *...      :: :

```

**Supplementary Figure 6 Protein sequence alignment of GON4L and Gon4la/b**  
This alignment was analyzed with Clustal W (<https://www.genome.jp/tools-bin/clustalw>).

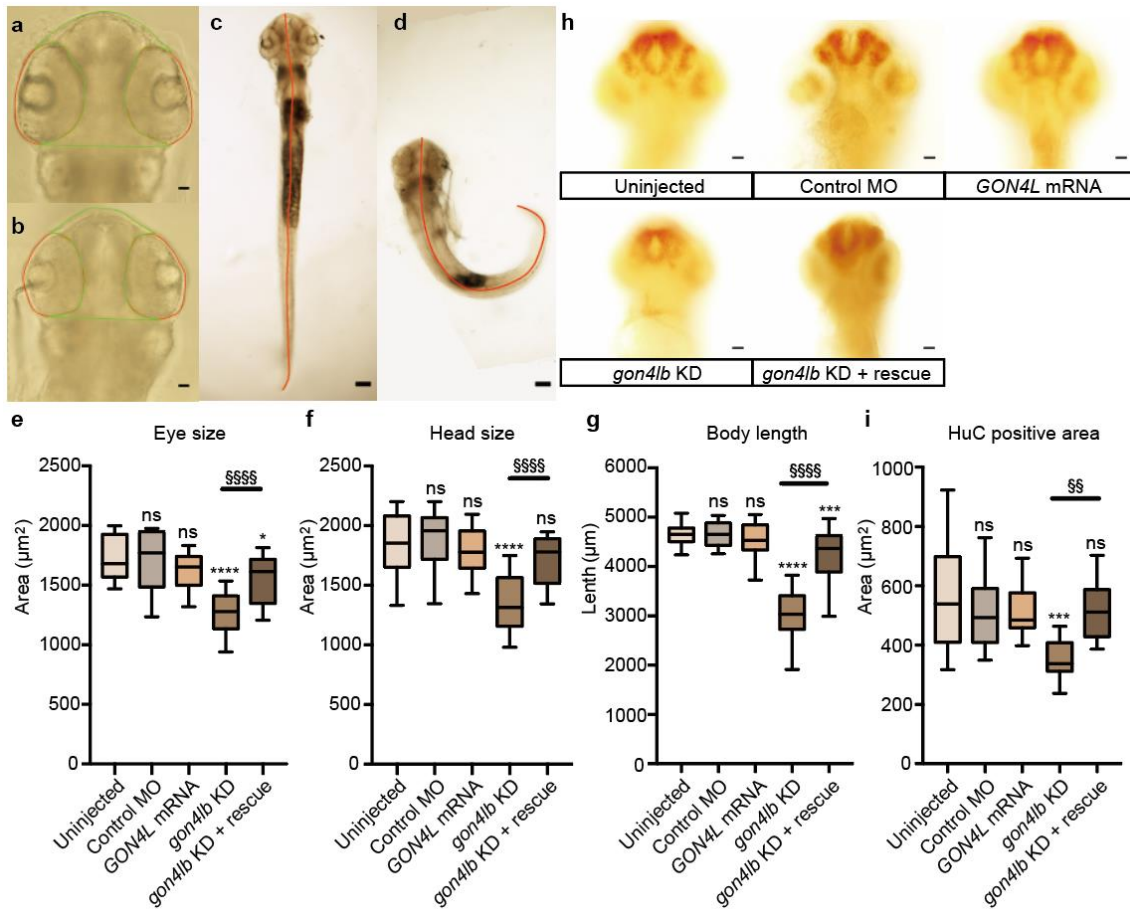

### Supplementary Figure 7 *gon4lb* antisense morpholino oligo knockdown and rescue in zebrafish embryos at 50 hpf

(a–d) Representative images of eye size, head size, and body length of 50-hpf zebrafish embryos injected with a standard control morpholino oligo (a, c) or a *gon4lb* morpholino oligo (b, d). The green and red lines in panels a and b delineate the contour of the head and eye, respectively, and red lines in panels c and d indicate the position for measuring the body axis. For head and eye size, uninjected wild-type: n=28, control MO: n=16, human *GON4L* mRNA: n=16, *gon4lb* MO: n=26, and *gon4lb* + human *GON4L* mRNA (rescue): n=20. For body length, uninjected wild-type: n=33, control MO: n = 28, human *GON4L* mRNA: n = 34, *gon4lb* MO: n = 30, and *gon4lb* MO + rescue: n=28. All images presented in a-d are dorsal views, with the anterior surface at the top. (e–g) Quantitative data showing eye size (e), head size (f), and body length (g). *gon4lb*-knockdown morphants showed reductions in eye size (26%), head size (26%), and body length (35%) compared with uninjected embryos, while embryos injected with the standard control MO did not display any abnormal changes. Co-injection of human *GON4L* mRNA and *gon4lb* MO into embryos restored eye size, head size, and body length. (h) Representative images



of wholemount zebrafish embryos immunostained with a HuC/HuD monoclonal antibody at 50 hpf. Images presented in h are ventral views, with the anterior side at the top. (i) Quantitative data showing the HuC/HuD-positive area of 50-hpf embryos (uninjected wild-type: n=29, control MO: n=18, human *GON4L* mRNA: n=20, *gon4lb* MO: n=16, and *gon4lb* MO + rescue: n=16). This phenotype was rescued by injection of human *GON4L* mRNA (a 30% recovery compared with the *gon4lb* MO group,  $p = 0.003$ ). Furthermore, injection of human *GON4L* mRNA into zebrafish embryos did not result in any specific changes in brain area compared with uninjected embryos. Scale bar: 50  $\mu\text{m}$  (a, b, h), 200  $\mu\text{m}$  (c, d). Data are shown as the mean  $\pm$  SEM; \* $p \leq 0.05$ , §§ $p \leq 0.01$ , \*\*\* $p \leq 0.001$ , \*\*\*\* $p \leq 0.0001$ , §§§§ $p \leq 0.0001$  using one-way ANOVA with post hoc Tukey's test.

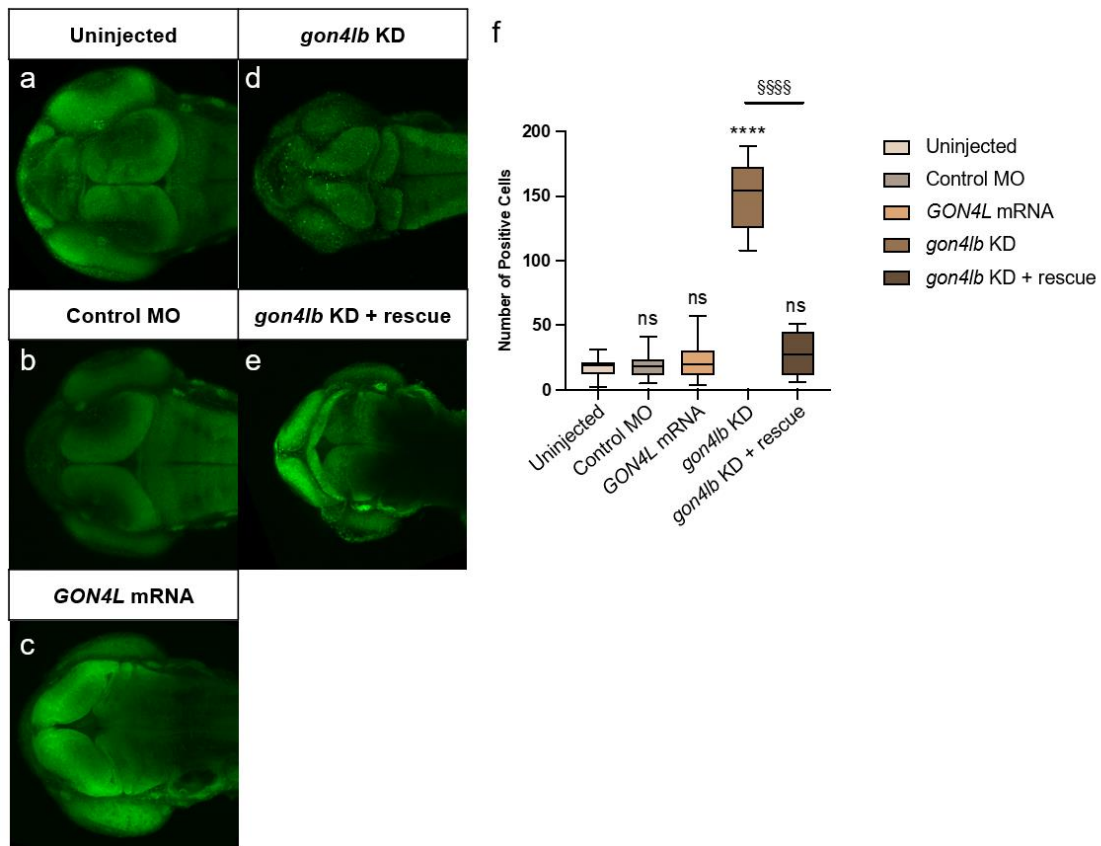

**Supplementary Figure 8 Antisense morpholino oligo knockdown of *gon4lb* causes cell death in the brain and eye of zebrafish embryos at 50-hpf.**

(a–e) Representative images of 50-hpf zebrafish embryos stained with Acridine Orange, where (a) is uninjected wild-type, (b) is injected with control morpholino oligo (MO), (c) is injected with human *GON4L* mRNA, (d) is injected with *gon4lb* MO, and (e) is co-injected with *gon4lb* MO and human *GON4L* mRNA for rescue. All images are dorsal views with the anterior aspect to the left. (f) Quantitative data of the number of Acridine Orange-positive cells in the head region of 50-hpf zebrafish embryos. Sample numbers are as follows: uninjected wild-type (n = 10), control MO (n = 10), human *GON4L* mRNA (n = 12), *gon4lb* MO (n = 11), and *gon4lb*+human *GON4L* mRNA (n=11). Data are shown as the mean ± SEM; \*\*\*\*p ≤ 0.0001; §§§§p ≤ 0.0001 using one-way analysis of variance (ANOVA) with post hoc Tukey’s test.

## Wild-type allele

```

1   ATGGGATGGA AACGCAAGTC TTCTTCTCCA GAACCACAAC
   M G W K R K S S S P E P Q P
41  CAAATCTTGT CAAACTACCA AAGAGGGAAT CCTCAGCAG
   N L V K L P K R E S L S R
81  ATCTCCTAGC ICATGGAAGA GGAAGGCCTC TACACCCAGT
   S P S S W K R K A S T P S
121 AAAACAAGA GCTGGACCTC CATTTCAGTCC TTTTCTCCAG
   K T K S W T S I Q S L S P D
161 ACAGGCATGT TGATCAGTGC AATGGCCAGG AGAAGATGTC
   R H V D Q C N G Q E K M S
201 CAGCGCAGGT CATGTTGAAG ATGACAGTGA CTGTATCCAG
   S A G H V E D D S D C I Q
241 TCCTCTACTC CAGTTTCATC CCCTTTGCGG TCAGAAGAGG
   S S T P V S S P L R S E E D
281 ATGCGGAGCT GGGTCTGGTC ATCAGTGTGG ATGAGGACAG
   A E L G L V I T V D E D R
321 ATGTGAAGGG GAGGAATGGC TGAAGAAACG GAATGGAGTG
   C E G E E W L K K R N G V
361 AATATAAAGA AGAATGGAAT AAATCAGACA GAAGGAGAGA
   N I K K N G I N Q T E G E I
  
```

## Knockout allele

```

1   ATGGGATGGA AACGCAAGTC TTCTTCTCCA GAACCACAAC
   M G W K R K S S S P E P Q P
41  CAAATCTTGT CAAACTACCC TCAGCAGATC TCCTAGCTCA
   N L V K L P S A D L L A H
81  TGGAAAGAGGA AGGCCTCTAC ACCCAGTAAA ACAAGAGCT
   G R G R P L H P V K Q R A
121 GGACCTCCAT TCAGTCCCTT TCICCCAGACA GGCAATGTTGA
   G P P F S P F L Q T G M L I
161 TCAGTGAAT GGCCAGGAGA AGATGTCCAG CCGAGGTCAAT
   S A M A R R R C P A Q V M
201 STTGAAGATG ACAGTGACTG TATCCAGTCC TCTACTCCAG
   L K M T V T V S S P L L Q
241 TTTCAATCCC TTTGCGGTCA GAAGAGGATG CGGAGCTGGG
   F H P L C G Q K R M R S W V
281 TCTGGTCATC ACTGIGGATG AGGACAGATG TGAAGGGGAG
   W S S L W M R T D V K G R
321 GAATGGCTGA AGAAACGGAA TGGAGTGAAT ATAAAGAAGA
   N G . R N G M E . I . R R
361 ATGGAATAAA TCAGACAGAA GGAGAGATCC CTCAGAAAGA
   M E . I R Q K E R S L R K R
  
```

### Supplementary Figure 9 Predicted mRNA and protein sequences of the zebrafish *gon4lb*-knockout allele

Left and right panels show wild-type and knockout sequences and encoded amino acid residues of the first part of the cDNA sequence of zebrafish *gon4lb* (NM\_001201535). The red highlighted region is the CRISPR/Cas9 knockout target region. The blue box indicates the 13 bp deletion (c.60\_72del). The premature stop codon in the knockout allele is represented as a dot within a boxed region in the right panel.

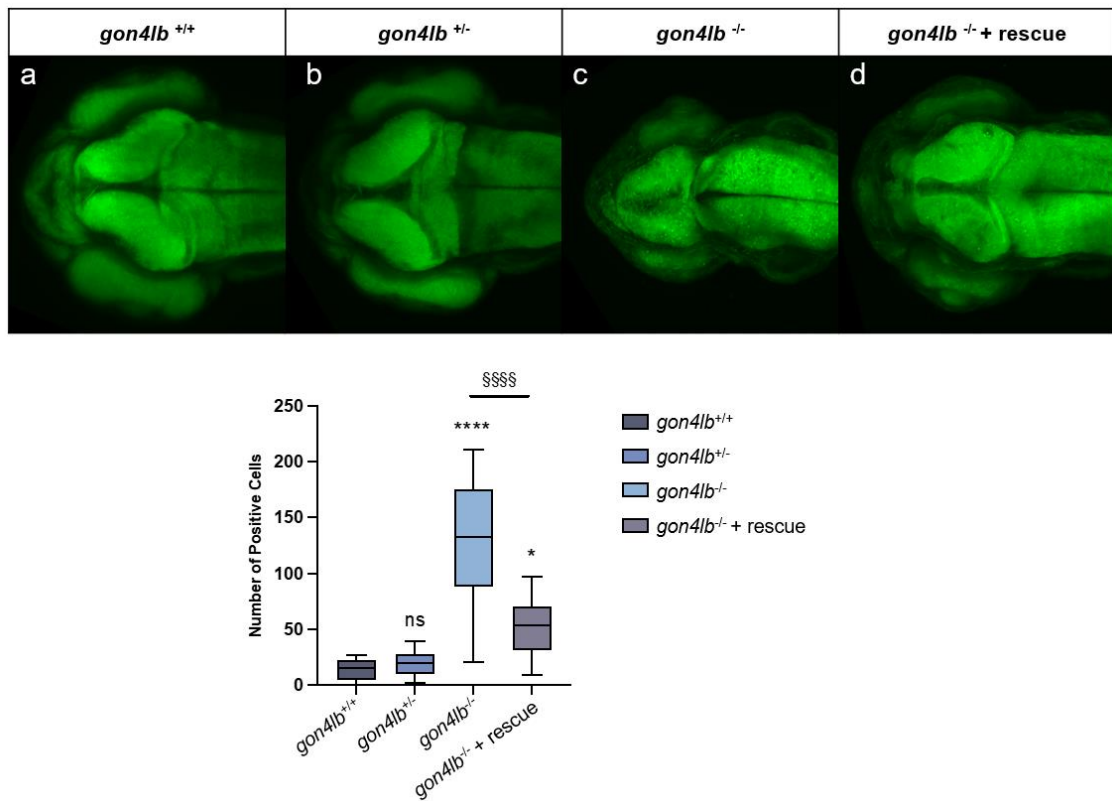

**Supplementary Figure 10 *gon4lb*<sup>-/-</sup> zebrafish embryos show increased cell death in the brain and eye, which is rescued by human *GON4L* mRNA co-injection.**

(a–d) Representative images of 50-hpf zebrafish embryos from the *gon4lb*-knockout line stained with Acridine Orange: (a) *gon4lb*<sup>+/+</sup>, (b) *gon4lb*<sup>+/-</sup>, (c) *gon4lb*<sup>-/-</sup>, and (d) *gon4lb*<sup>-/-</sup> embryos injected with human *GON4L* mRNA. All images are dorsal views with the anterior aspect to the left. (e) Quantitative data show the number of Acridine Orange-positive cells in the head region of 50-hpf zebrafish embryos from the *gon4lb*-knockout line. Sample numbers are as follows: *gon4lb*<sup>+/+</sup> (n = 10), *gon4lb*<sup>+/-</sup> (n = 11), *gon4lb*<sup>-/-</sup> (n = 11), and *gon4lb*<sup>-/-</sup> embryos injected with human *GON4L* mRNA (n=13). Data are shown as the mean ± SEM; \*p ≤ 0.05; \*\*\*\*p ≤ 0.0001, §§§§p ≤ 0.0001 using one-way ANOVA with post hoc Tukey's test.

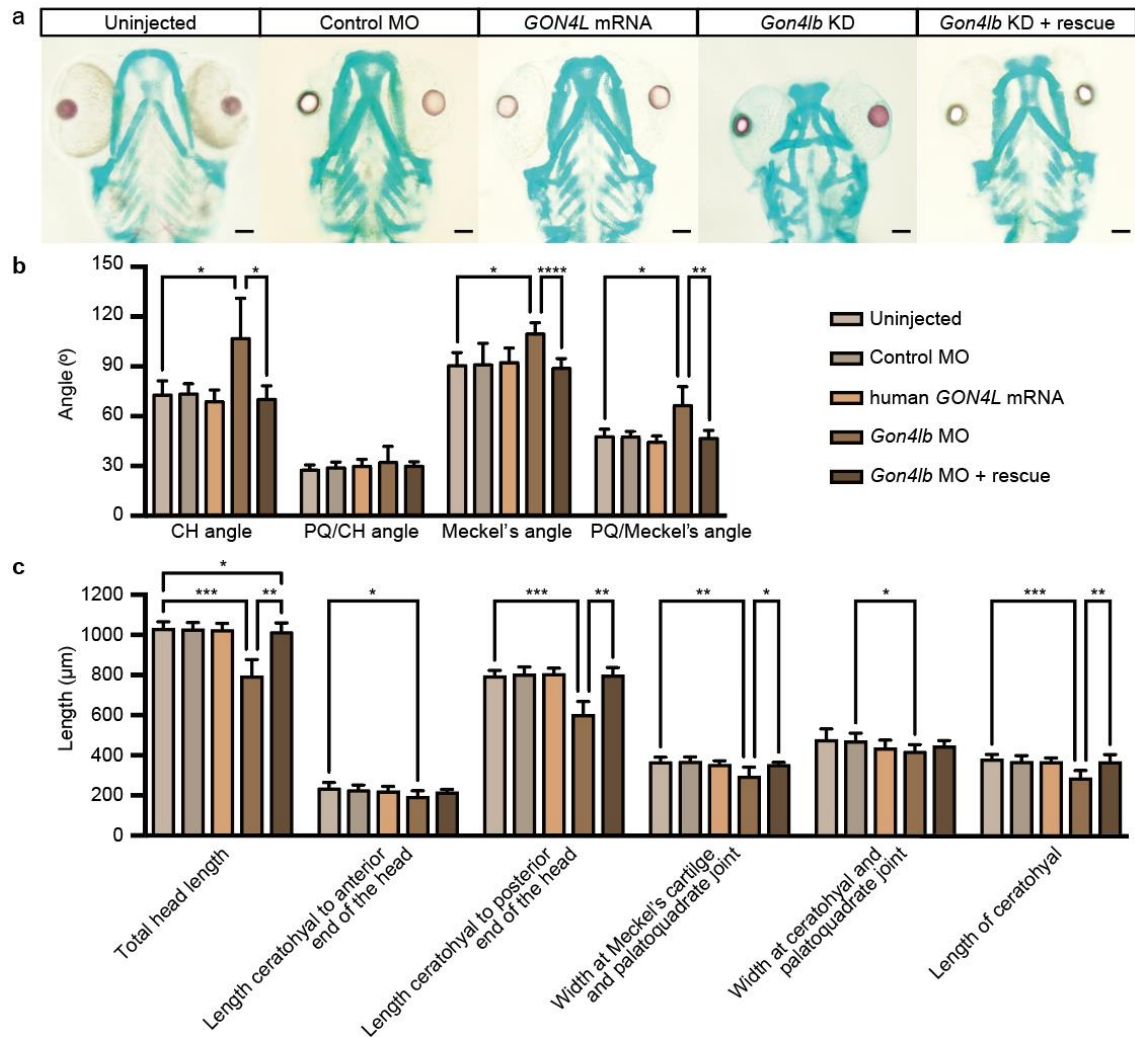

### Supplementary Figure 11 *gon4lb* antisense MO knockdown causes abnormal craniofacial development

(a) Representative images of head cartilage from 5-dpf zebrafish embryos stained with Alcian blue and Alizarin Red (10 embryos each). All images are ventral views, with the anterior aspect at the top. Scale bar: 100  $\mu\text{m}$ . (b,c) Quantitative data show the angle of four different mineralized craniofacial bone elements (b) and the length of six different mineralized craniofacial bone elements (c) from 5-dpf zebrafish embryos. Data are shown as the mean  $\pm$  SEM; \* $p \leq 0.05$ ; \*\* $p \leq 0.01$ ; \*\*\* $p \leq 0.001$ ; \*\*\*\* $p \leq 0.0001$  using two-way ANOVA with Tukey's multiple comparisons test ( $\alpha = 0.05$ ).

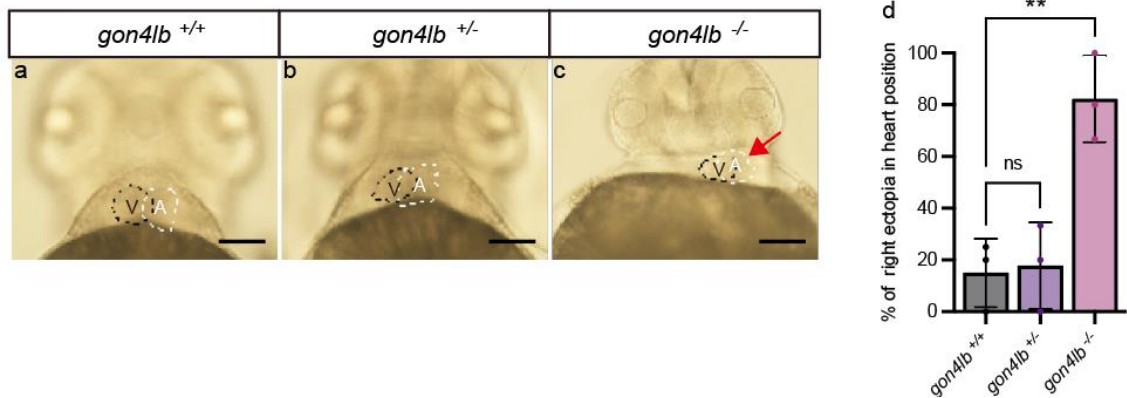

### Supplementary Figure 12 Left-right heart displacement induced by *gon4lb* gene knockout

(a-c) Representative images of heart positioning in zebrafish embryos at 48 hpf under light microscopy. Most embryos of *gon4lb*<sup>+/+</sup>(a) and *gon4lb*<sup>+/-</sup>(b) genotypes exhibit normal left-sided heart positioning. A subset of *gon4lb*<sup>-/-</sup>(c) embryos display abnormal right-sided heart positioning as indicated by a red arrow. The boundaries of the atrium and ventricle are outlined with white and black dashed lines, respectively. All images are ventral views with anterior at the top. Scale bar: 100  $\mu$ m. Abbreviations: (A) atrium, (V) ventricle. (d) Percentage of embryos exhibiting left-right heart displacement anomalies at 48 hpf. Sample sizes are *gon4lb*<sup>+/+</sup> (n=14), *gon4lb*<sup>+/-</sup> (n=13), *gon4lb*<sup>-/-</sup> (n=15). Data are presented as mean  $\pm$  SEM; ns, not significant; \*\*p < 0.01; analyzed using one-way analysis of variance (ANOVA) with Tukey's post hoc test.

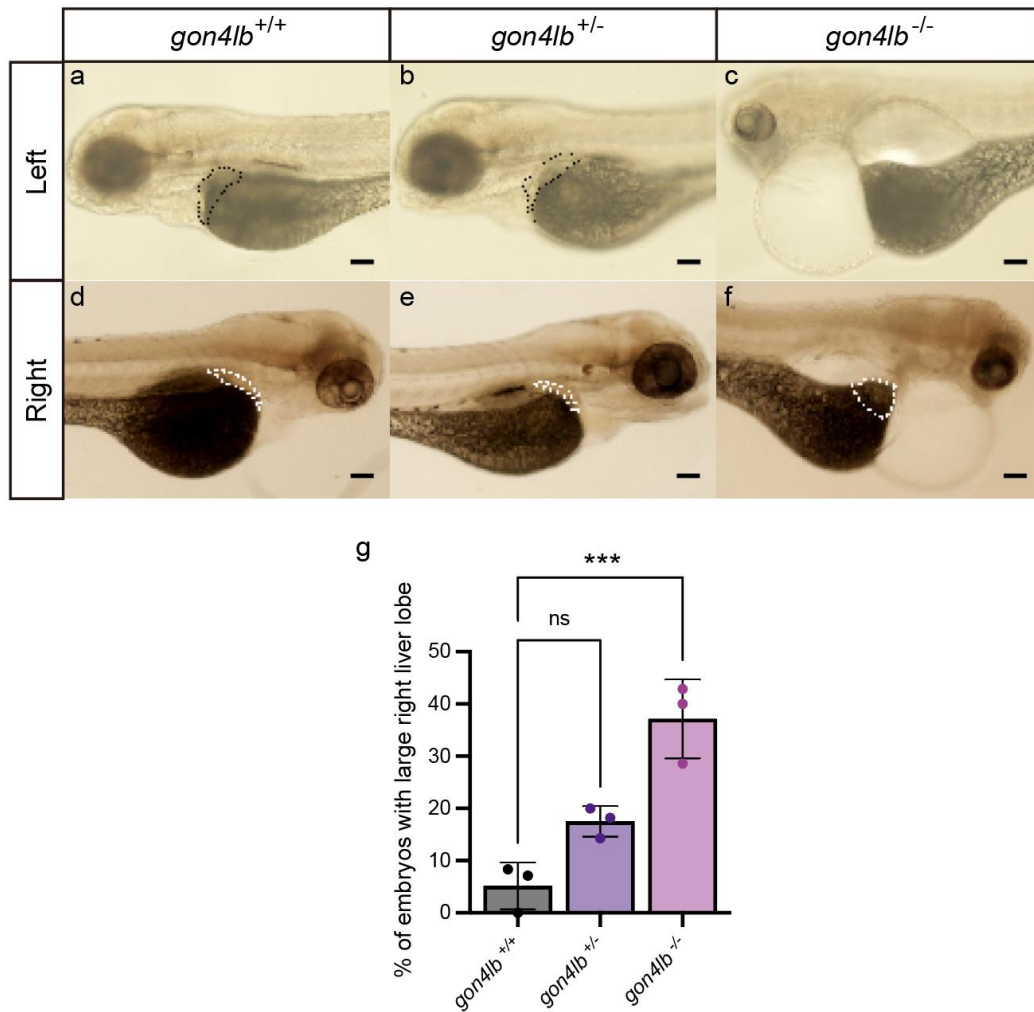

### Supplementary Figure 13 Left-right liver displacement induced by *gon4lb* gene knockout

(a-f) Representative images of liver positioning in zebrafish embryos at 5 dpf under light microscopy, shown in left lateral views (a-c) and right lateral views (d-f). In most embryos of *gon4lb*<sup>+/+</sup> (a and d) and *gon4lb*<sup>+/-</sup> (b and e) genotypes, the left lobe of the liver is significantly larger than the right lobe; however, in a subset of *gon4lb*<sup>-/-</sup> (c and f) embryos, the right liver lobe is observed to be larger than or equal to the left lobe. The liver boundaries are delineated by black and white dashed lines in left (a-c) and right (d-f) lateral views. Liver is not observed in left lateral view of panel c. All images are lateral views, with anterior to the left in (a-c) and anterior to the right in (d-f). Scale bar: 100  $\mu$ m.

(G) Percentage of embryos displaying abnormal right lobe equal to or larger than the left lobe at 5 dpf. Sample sizes are *gon4lb*<sup>+/+</sup> (n=31), *gon4lb*<sup>+/-</sup> (n=26), *gon4lb*<sup>-/-</sup> (n=19). Data are presented as mean  $\pm$  SEM; ns, not significant; \*\*\*p < 0.001; analyzed using one-way analysis of variance (ANOVA) with Tukey's post hoc test.



Isoform Expression of GON4L: ENSG00000116580.18 gon-4 like [Source:HGNC Symbol;Acc:HGNC:25973]

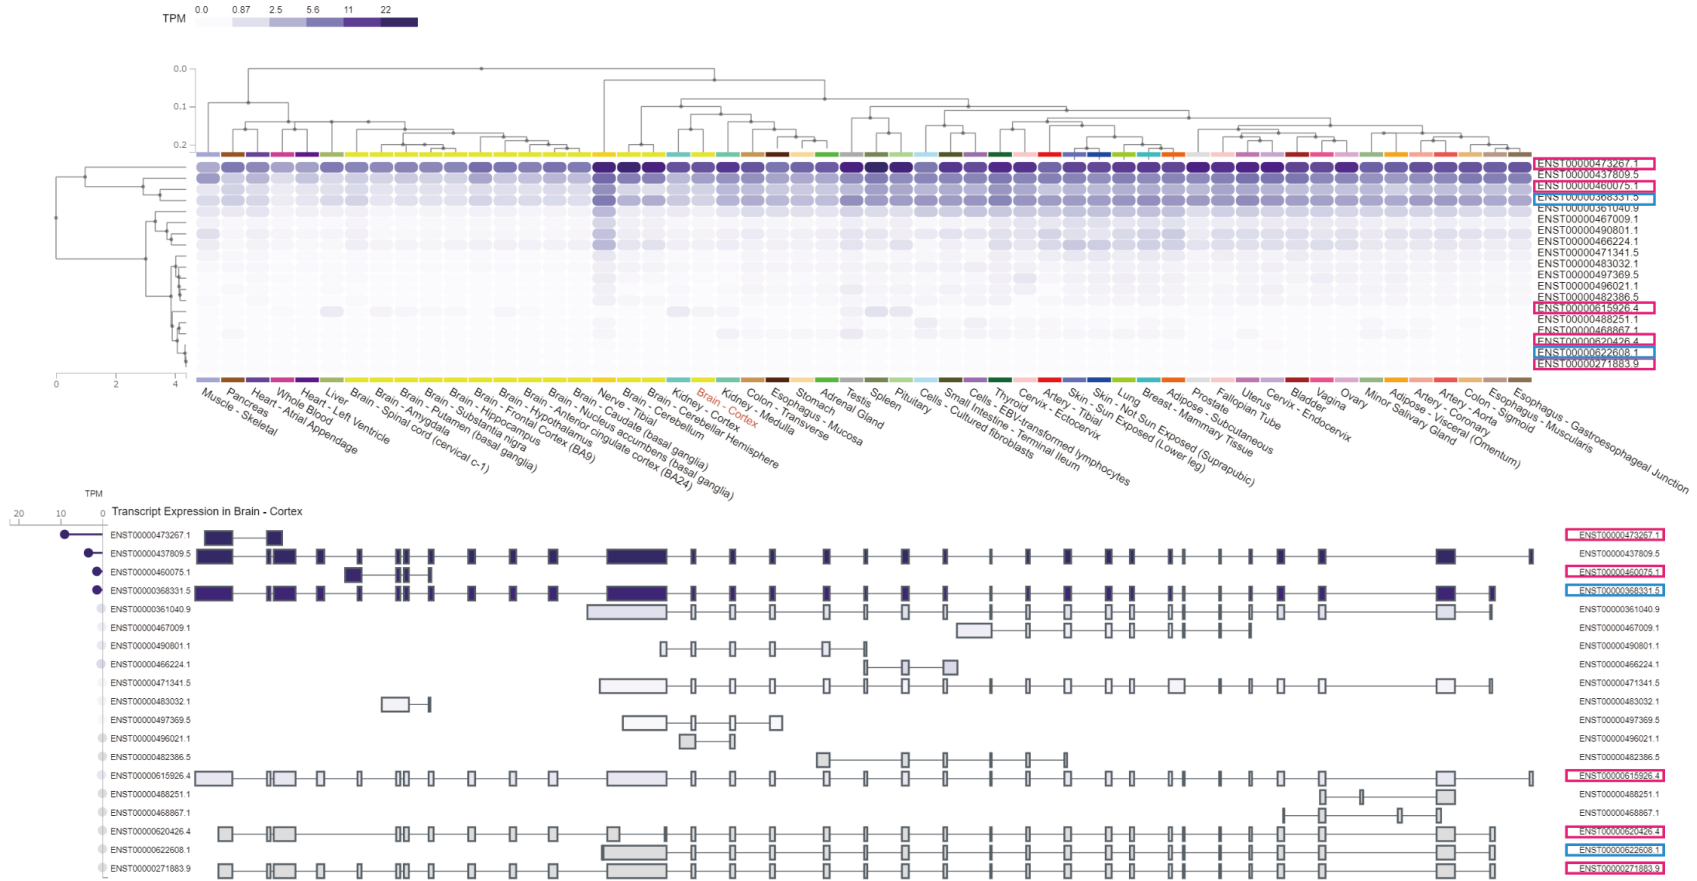

### Supplementary Figure 14 Human *GON4L* expression in GTEx portal

Isoform-specific expression of human *GON4L* in all tissues (upper panel) and brain cortex (lower panel) is shown. Isoforms were annotated using Ensembl. The isoforms boxed with pink and blue lines correspond to long and short isoforms based on the coding protein length, respectively. Among them, ENST00000368331.5 is equivalent to one of three long isoforms NM\_001262860.2.



### A anti-Gon4l

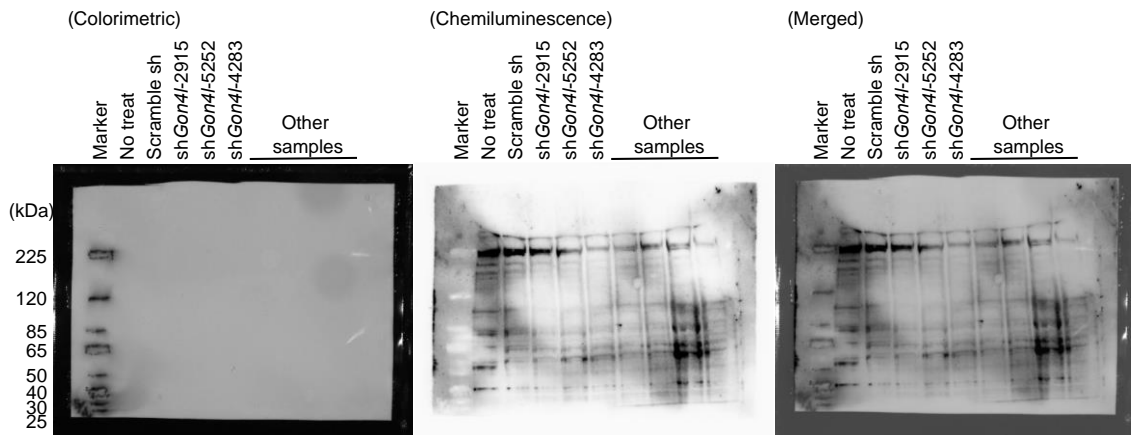

### B anti-β-actin

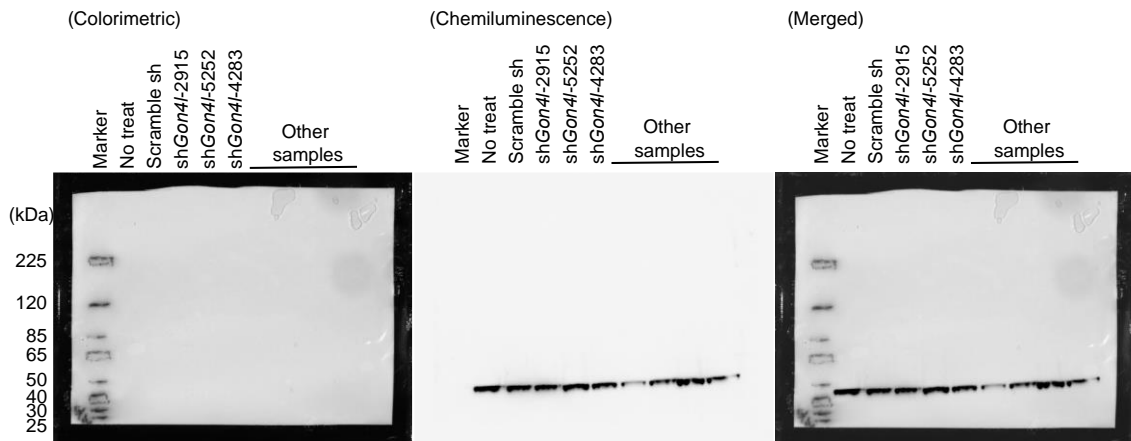

### Supplementary Figure 15 Uncropped blots of Western blotting showing *Gon4l*-knockdown efficiencies in PC12 cells

Uncropped blots from Figure. 3C. Representative blot images were shown (three independent experiments). Colorimetric and chemiluminescent images were detected and merged with a ChemiDoc Touch imaging system (BioRad).

**Supplementary Table 1 *GON4L*-related facial characteristics and other features**

|                                | Patient 1 | Patient 2 | Patient 3 | Sum |
|--------------------------------|-----------|-----------|-----------|-----|
| Facial asymmetry*              | -         | +         | +         | 3   |
| Long face                      | +         | +         | +         | 3   |
| High forehead                  | +         | +         | +         | 3   |
| Thick eyebrows                 | -         | +         | +         | 2   |
| Downslanted palpebral fissures | +         | +         | +         | 3   |
| Strabismus                     | NA        | +         | +         | 2   |
| Broad nasal root               | -         | +         | +         | 2   |
| Broad nose                     | -         | +         | +         | 2   |
| Beaked tip                     | +         | +         | -         | 2   |
| Bulbous tip                    | -         | -         | +         | 1   |
| Deviated nasal septum          | -         | +         | +         | 2   |
| Prominent cheek                | -         | + (left)  | + (right) | 2   |
| Short philtrum                 | -         | +         | -         | 1   |
| Long and prominent philtrum    | -         | -         | +         | 1   |
| Broad chin                     | -         | +         | -         | 1   |
| Pointed chin                   | +         | -         | +         | 2   |
| Low-set ears                   | -         | +         | +         | 2   |
| Folded helix                   | -         | +         | +         | 2   |
| Situs inversus totalis         | -         | +         | +         | 2   |

NA: Not assessed

\*except for eyes
